# Supplementary material
Source: HighWire-hosted journal article supplement (https://bmjopen.bmj.com/content/7/8/e015952)
Supplement: inline-supplementary-material-1 [file inline-supplementary-material-1.pdf]

Appendix Table 1. Case characteristics

|                          |               | Per tooth<br>extraction (%) | Per procedure (%) | Per patient (%) |
|--------------------------|---------------|-----------------------------|-------------------|-----------------|
| Sex                      |               |                             |                   |                 |
|                          | Male          | 589 (49.2)                  | 292 (46.0)        | 244 (45.1)      |
|                          | Female        | 607 (50.7)                  | 342 (53.9)        | 297 (54.9)      |
| Age (years)              | Mean $\pm$ SD | 62.9 $\pm$ 17.7             | 59.8 $\pm$ 18.8   | -               |
| Antiplatelet agents      |               |                             |                   |                 |
|                          | Yes           | 210 (17.5)                  | 104 (16.4)        | -               |
|                          | No            | 986 (82.4)                  | 530 (83.6)        | -               |
| DOACs                    |               |                             |                   |                 |
|                          | Yes           | 72 (6.0)                    | 41 (6.4)          | -               |
|                          | No            | 1,124 (93.9)                | 593 (93.5)        | -               |
| VKAs                     |               |                             |                   |                 |
|                          | Yes           | 100 (8.3)                   | 50 (7.8)          | -               |
|                          | No            | 1,096 (91.6)                | 584 (92.1)        | -               |
| Local haemostatic agents |               |                             |                   |                 |
|                          | Yes           | 456 (36.2)                  | -                 | -               |
|                          | No            | 740 (63.8)                  | -                 | -               |
| Wound suturing           |               |                             |                   |                 |
|                          | Yes           | 705 (58.9)                  | -                 | -               |
|                          | No            | 491 (41.0)                  | -                 | -               |
| Prescription of NSAIDs   |               |                             |                   |                 |
|                          | Yes           | 620 (51.8)                  | 358 (56.4)        | -               |
|                          | No            | 576 (48.1)                  | 276 (43.5)        | -               |
| Post-extraction bleeding |               |                             |                   |                 |
|                          | Yes           | 29 (2.4)                    | 15 (2.3)          | 15 (2.7)        |
|                          | No            | 1,167 (97.5)                | 619 (97.6)        | 526 (97.2)      |

SD, standard deviation; DOACs, direct oral anticoagulants; VKAs, vitamin K antagonists; NSAIDs, nonsteroidal anti-inflammatory drugs.
