# Supplementary material
Source: HighWire-hosted journal article supplement (https://bmjopen.bmj.com/content/7/8/e015952)
Supplement: inline-supplementary-material-2 [file inline-supplementary-material-2.pdf]

Appendix Table 2. The three bleeding risk scores in the anticoagulant group

| HAS-BLED score |             | ATRIA score |             | ORBIT score |             |
|----------------|-------------|-------------|-------------|-------------|-------------|
| Score          | Extractions | Score       | Extractions | Score       | Extractions |
| 0              | 20          | 0           | 48          | 0           | 24          |
| 1              | 74          | 1           | 9           | 1           | 29          |
| 2              | 69          | 2           | 35          | 2           | 29          |
| 3              | 8           | 3           | 58          | 3           | 30          |
| 4              | 1           | 4           | 1           | 4           | 51          |
| 5              | 0           | 5           | 21          | 5           | 8           |
| 6              | 0           | 6           | 0           | 6           | 1           |
| 7              | 0           | 7           | 0           | 7           | 0           |
| 8              | 0           | 8           | 0           | -           | -           |
| 9              | 0           | 9           | 0           | -           | -           |
| -              | -           | 10          | 0           | -           | -           |

HAS-BLED, Hypertension, Abnormal renal/liver function, Stroke, Bleeding history or predisposition, Labile international normalized Ratio, Elderly, Drugs/alcohol; ATRIA, Anticoagulation and Risk Factors in Atrial Fibrillation; ORBIT, Outcomes Registry for Better Informed Treatment.
